# Supplementary material
Source: PubMed Central journal article supplement (PMC6371687)
Supplement: ehp3871.smcontents.508.pdf [file ehp3871.smcontents.508.pdf]

**Note to readers with disabilities:** *EHP* strives to ensure that all journal content is accessible to all readers. However, some figures and Supplemental Material published in *EHP* articles may not conform to [508 standards](#) due to the complexity of the information being presented. If you need assistance accessing journal content, please contact [ehp508@niehs.nih.gov](mailto:ehp508@niehs.nih.gov). Our staff will work with you to assess and meet your accessibility needs within 3 working days.

### **Supplemental Material**

#### **Advancements in Life Cycle Human Exposure and Toxicity Characterization**

Peter Fantke, Lesa Aylward, Jane Bare, Weihsueh A. Chiu, Robin Dodson, Robert Dwyer, Alexi Ernstoff, Brett Howard, Matti Jantunen, Olivier Jolliet, Richard Judson, Nienke Kirchhübel, Dingsheng Li, Aubrey Miller, Greg Paoli, Paul Price, Lorenz Rhomberg, Beverly Shen, Hyeong-Moo Shin, Justin Teeguarden, Daniel Vallero, John Wambaugh, Barbara A. Wetmore, Rosemary Zaleski, and Thomas E. McKone

#### **Table of Contents**

**Table S1.** Key points for advancing current exposure and toxicity characterization in life cycle impact assessment and similar comparative assessment frameworks.

#### **References**
